# Supplementary material for: Specific Irreversible Cell-Cycle Arrest and Depletion of Cancer Cells Obtained by Combining Curcumin and the Flavonoids Quercetin and Fisetin
Source: MDPI journal article supplement (doi:10.3390/genes13071125), 2022-06-23
Supplement: s1 [file s1]

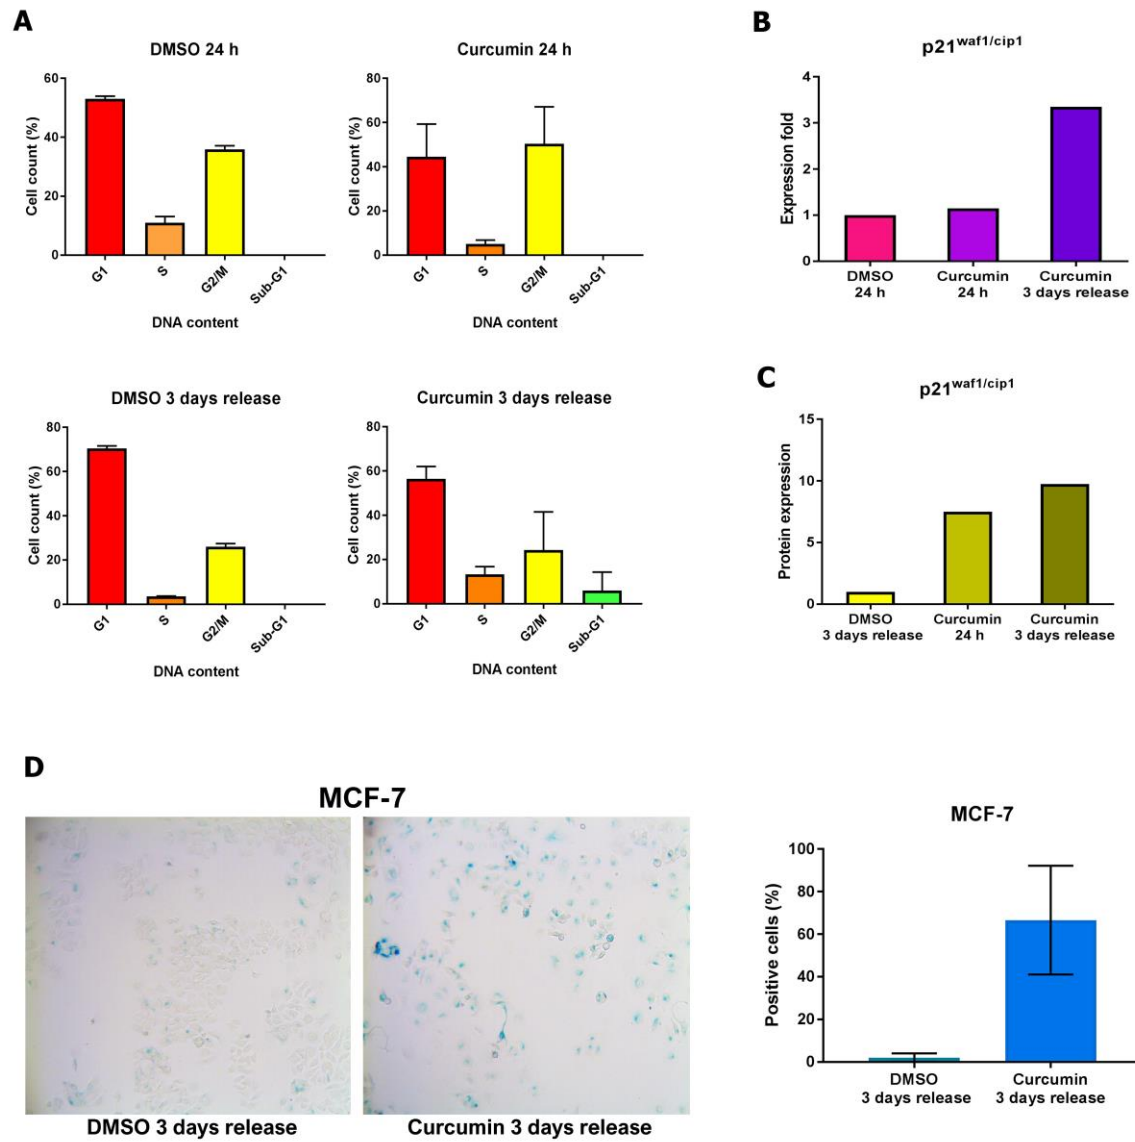

**Figure S1.** Curcumin triggers senescence induction in MCF-7 cells through cell-cycle arrest and in a p21<sup>waf1/cip1</sup> - dependent manner.

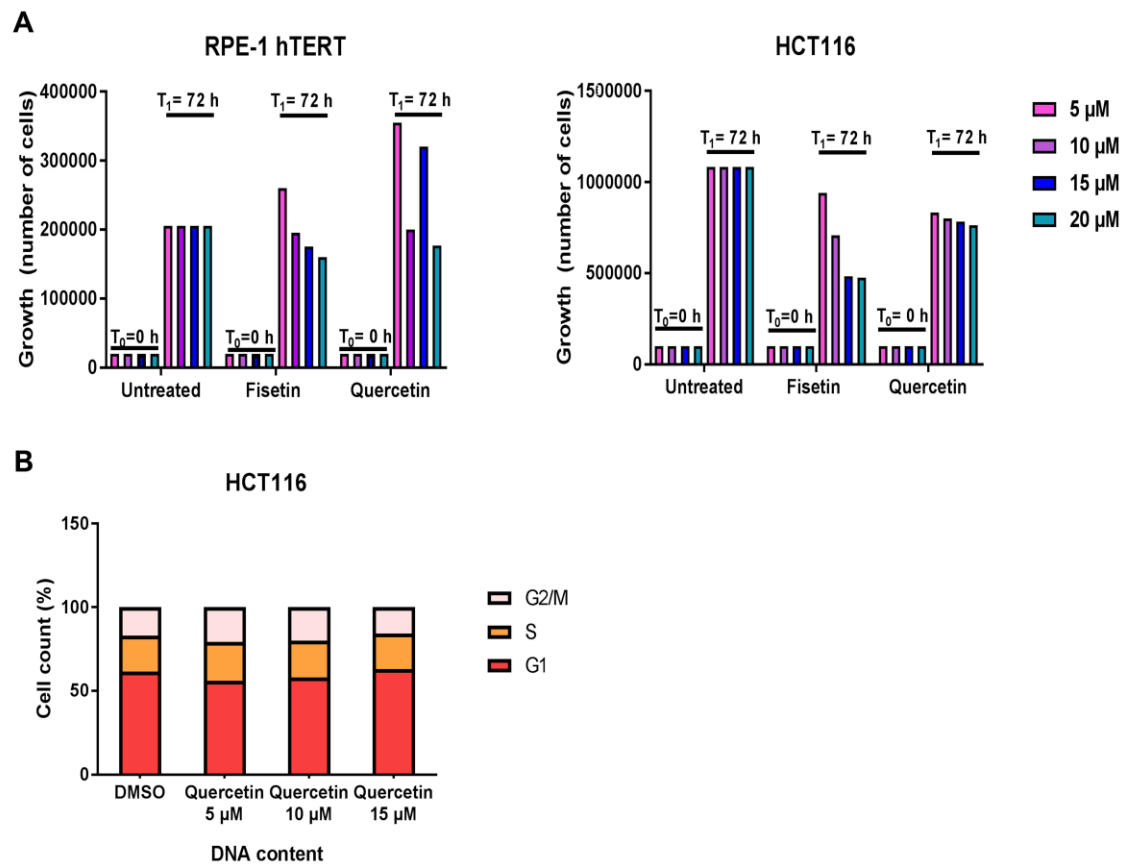

**Figure S2:** Senolytic drugs Quercetin and Fisetin show no cytotoxic or antiproliferative effects at the concentrations 5 and 10  $\mu$ M.
